# Supplementary material for: The Impact of Coworkers’ Safety Violations on an Individual Worker: A Social Contagion Effect within the Construction Crew
Source: PubMed Central journal article supplement (PMC5923815; doi:10.3390/ijerph15040773), 2018-04-17
Supplement: ijerph-15-00773-s001.pdf [file ijerph-15-00773-s001.pdf]

### ***1. The 6 items of coworkers' situational safety violations***

**CSSV1:** My coworkers always carry out their work in a safe manner.

**CSSV2:** My coworkers always report all safety-related incidents.

**CSSV3:** My coworkers always wear personal protective equipment, even when it's inconvenient and uncomfortable.

**CSSV4:** My coworkers never find following safety procedures a hassle.

**CSSV5:** My coworkers always report others if they break any safety rules.

**CSSV6:** My coworkers always use safety equipment, even when it's not easily available.

### ***2. The 4 items of coworkers' situational safety violations***

**CRSV1:** My coworkers sometimes cut corners if it makes the task easier.

**CRSV2:** Production pressures mean that coworkers sometimes bend the rules.

**CRSV3:** Occasionally my coworkers bend the rules when they know it is safe to do so.

**CRSV4:** When the boss is not around my coworkers can be more flexible with which procedures they follow.

### ***3. The 4 items of perceived social support***

**PSS1:** Management frequently discusses safety issues with the workers.

**PSS2:** Management can always deal with the safety issues reported by workers in a timely manner.

**PSS3:** There is frequent communication about safety issues within our workgroup.

**PSS4:** My coworkers always warn other workers if they break any safety rules.

### ***4. The 4 items of perceived production pressure***

**PPP1:** We often emphasize production goals over safety goals in my workgroup.

**PPP2:** We are often in such a hurry that safety is temporarily overlooked in my workgroup.

**PPP3:** Sometimes there is not enough time available for following safety rules and procedures.

**PPP4:** We take short cuts because we need to get the job done in a timely manner.

**PPP5:** Short cuts and risk taking are common due to the heavy workload.

**PPP6:** We often need to finish our work as quick as possible due to heavy work pressure.

### ***5. The 4 items of attitudinal ambivalence towards safety compliance***

**AASC1:** Following safety procedures makes working more difficult.

**AASC2:** Wearing personal protective equipment bothers my daily work.

**AASC3:** Wearing personal protective equipment helps me avoid possible damage.

**AASC4:** Following safety procedures makes me feel safe.

### ***6. The 4 items of safety motivation***

**SM1:** I believe that workplace safety is an important issue.

**SM2:** I feel that it is worthwhile to put in effort to maintain or improve workplace safety.

**SM3:** I enjoy working safely on site.

**SM4:** I feel guilty when I don't work safely.

***7. The 6 items of individuals' situational safety violations***

**ISSV1:** I always carry out my work in a safe manner.

**ISSV2:** I always report all safety-related incidents.

**ISSV3:** I always wear personal protective equipment, even when it's inconvenient and uncomfortable.

**ISSV4:** I never find following safety procedures a hassle.

**ISSV5:** I always report others if they break any safety rules.

**ISSV6:** I always use safety equipment, even when it's not easily available.

***8. The 4 items of individuals' situational safety violations***

**IRSV1:** I sometimes cut corners if it makes the task easier.

**IRSV2:** Production pressures mean that I sometimes bend the rules.

**IRSV3:** Occasionally I bend the rules when I know it is safe to do so.

**IRSV4:** When my boss is not around I can be more flexible with which procedures I follow.
